1 **TITLE:** A sparse, spatially biased subtype of mature granule cell is preferentially recruited in  
2 hippocampal-associated behaviors

3  
4 Sarah R. Erwin<sup>1,2\*</sup>, Weinan Sun<sup>2\*</sup>, Monique Copeland<sup>2</sup>, Sarah Lindo<sup>2</sup>, Nelson Spruston<sup>2</sup>, Mark S.  
5 Cembrowski<sup>1,2,3†</sup>

6  
7 <sup>1</sup> Dept. of Cellular and Physiological Sciences, Life Sciences Institute, University of British  
8 Columbia

9 2350 Health Sciences Boulevard, Vancouver, BC, Canada

10 <sup>2</sup> Janelia Research Campus, Howard Hughes Medical Institute  
11 19700 Helix Dr., Ashburn, VA 20147, USA

12 <sup>3</sup> Djavad Mowafaghian Centre for Brain Health, University of British Columbia  
13 2215 Wesbrook Mall, Vancouver, BC, Canada

14

15 \* Authors Contributed Equally

16 † Corresponding Author and Lead Contact: [mark.cembrowski@ubc.ca](mailto:mark.cembrowski@ubc.ca)

17

18

## 19 **ABSTRACT**

20 Animals can store information about experiences by activating specific neuronal  
21 populations, and subsequent reactivation of these neural ensembles can lead to recall of salient  
22 experiences. In the hippocampus, granule cells of the dentate gyrus participate in such memory  
23 engrams; however, whether there is an underlying logic to granule cell participation has not been  
24 examined. Here, we found that a broad range of novel experiences preferentially activates  
25 granule cells of the suprapyramidal blade relative to the infrapyramidal blade. Motivated by this,  
26 we identified a suprapyramidal-blade-enriched population of granule cells with distinct spatial,  
27 morphological, physiological, and developmental properties. Via transcriptomics, we mapped  
28 these traits onto a sparse and discrete granule cell subtype that was recruited at a ten-fold greater  
29 frequency than expected by subtype prevalence, constituting the majority of all recruited granule  
30 cells. Thus, a rare and spatially localized granule cell subtype is intrinsically predisposed to  
31 activation during hippocampal memory formation.

32

## 33 **INTRODUCTION**

34 The hippocampus is a brain region critical for episodic memory (Scoville and Milner,  
35 1957), spatial navigation (O'Keefe and Nadel, 1978), emotion (Kjelstrup et al., 2002), and  
36 representation of a wide range of other internal and external states (Aronov et al., 2017; Cioocchi  
37 et al., 2015; Hitti and Siegelbaum, 2014; MacDonald et al., 2011). A central focus of  
38 hippocampal neuroscience lies in understanding the neurobiological substrates of this diverse

39 functionality. One approach to identifying these substrates is centered around the perspective of  
40 cell types: identifying groups of cells that covary in specific properties, and  
41 via inference or further experimental assay, mapping such cell types onto functional  
42 contributions.

43 Classically, such cell-type divisions have been defined at a relatively broad level – for  
44 example, granule cells of the dentate gyrus, and pyramidal cells of regions CA3 and CA1  
45 (Ramón y Cajal, 1911). More recently, an accumulation of evidence has emerged that such  
46 broadly defined hippocampal cell types can exhibit marked within-cell-type heterogeneity. Such  
47 work has largely focused on pyramidal neurons, wherein the long-range projections of these cells  
48 allow specific circuits to be experimentally manipulated and interpreted (Berns et al., 2018;  
49 Cembrowski et al., 2018a; Cembrowski and Spruston, 2019; Ciocchi et al., 2015; Jimenez et al.,  
50 2018; Okuyama et al., 2016; Soltesz and Losonczy, 2018; Spellman et al., 2015; Xu et al., 2016).  
51 In stark contrast to output pyramidal cells, markedly little is known about the subtype-specific  
52 decomposition of mature granule cells (GCs) of the dentate gyrus (DG), which form the local  
53 input layer of the hippocampus (Scharfman, 2007).

54 The relative lack of subtype-specific insight into mature GC organization and recruitment  
55 is striking, as GCs are a focal point of engram memory research (Bernier et al., 2017; Chen et al.,  
56 2019; Denny et al., 2014; Guskjolen et al., 2018; Kheirbek et al., 2013; Liu et al., 2012; Park et  
57 al., 2016; Ramirez et al., 2013; Redondo et al., 2014; Ryan et al., 2015; Tonegawa et al., 2015).  
58 Notably, previous work potentially hints at the existence of DG subtype-specific recruitment:  
59 interventional access-and-manipulate approaches anecdotally exhibit GCs in the suprapyramidal  
60 blade preferentially recruited relative to the infrapyramidal blade (e.g., Chen et al., 2019; Liu et  
61 al., 2012; Ramirez et al., 2013; Redondo et al., 2014; Ryan et al., 2015). This across-blade  
62 difference has been more formally examined in observational immediate-early gene experiments,  
63 wherein activity has been shown to be biased to the suprapyramidal blade in novel environment  
64 exposure (Chawla et al., 2005; Chawla et al., 2018; Guenther et al., 2013; Penke et al., 2011;  
65 Ramirez-Amaya et al., 2005). To date, the degree to which this blade-specific recruitment  
66 generalizes across behaviors, maps onto GC subtypes, and ultimately relates to function are  
67 unknown.

68 Here, we sought to understand whether functional recruitment of GCs could be  
69 interpreted and predicted according to underlying subtype-specific rules. Beginning with activity  
70 labeling, we found blade-specific activity differences emerged across a wide range of disparate

71 behavioral paradigms. We registered this functional heterogeneity with underlying differences in  
72 GC morphology, physiology, spatial location, and gene expression, and mapped this multimodal  
73 heterogeneity onto a discretely separate and rare mature GC subtype. Finally, we show that this  
74 subtype is preferentially activated by experiences associated with hippocampal-dependent  
75 memory, accounting for 70-80% of recruited GCs despite comprising only 5% of the total GC  
76 population. This work leads to the unexpected conclusion that subtype-specific heterogeneity  
77 exists and predicts recruitment at the first stage of hippocampal processing.

78

## 79 **RESULTS**

### 80 *Behavior preferentially tags suprapyramidal blade granule cells*

81 We began by confirming that GCs of the suprapyramidal blade of the DG (i.e., located  
82 proximal to stratum lacunosum-moleculare; Fig. 1A) were selectively activated by exposure to a  
83 novel environment, as previously shown (Chawla et al., 2005; Chawla et al., 2018; Guenther et  
84 al., 2013; Penke et al., 2011). To do this, we introduced double-transgenic FosTRAP (i.e., cFos-  
85 cre(ERT2)) x Ai14 (i.e., LSL-tdTomato) mice (Guenther et al., 2013) to a novel environment  
86 and, after 20 minutes of exploration, administered 4-OHT prior to returning animals to their  
87 homecage (Fig. 1B). This inducible transgenic system enabled fluorescent tagging of cells active  
88 during novel environment exploration, and labeled cells that were largely restricted to the  
89 suprapyramidal blade (Fig. 1C).

90 In general, tdTomato-labeled cells exhibited morphological properties consistent with  
91 excitatory granule cells. For example, labeled cells exhibited apical dendritic trees (Fig. 1C), and  
92 also showed prominent dendritic spines (Supplemental Fig. 1). Remarkably, many tdTomato-  
93 labeled cells also exhibited a cell body at or beyond the interface between the granule cell layer  
94 and the inner molecular layer (IML) (e.g., Fig. 1D and Supplemental Fig. 1; 43% of examined  
95 neurons had cell bodies clearly displaced in or beyond the IML, n = 56/130). Despite these cell  
96 bodies being displaced relative to the classical granule cell layer, multiple GC markers (Prox1  
97 and Pcp4; Cembrowski et al., 2016b) labeled these cells (Fig. 1D; 100% of examined displaced  
98 tdTomato-labeled cells exhibited double labeling for both Prox1 and Pcp4; n=10/10).

99 We next examined whether this blade specificity generalized to other hippocampal-  
100 associated behavioral paradigms. Similar suprapyramidal blade-specific recruitment was seen  
101 following foot shock in a novel environment, introduction of novel objects or odors into the  
102 homecage, introduction of a conspecific, and participation in a forced swim test (representative

103 images: Fig. 1E-I; summary data: Fig. 1J). In total, preferential suprapyramidal blade activation  
104 occurred in behaviors evoking memory, spatial navigation, socialization, and stress.

105

### 106 *Tagging is consistent with bona fide activity differences*

107 We next performed control experiments to help interpret these previous results. First, we  
108 performed negative controls to examine the extent of activity labeling in other settings. Here, we  
109 found behaviorally induced labeling was much greater than in saline-control animals and animals  
110 receiving 4-OHT in their homecage (see also Guenther et al., 2013), as well as animals  
111 transferred and handled in behavior room without a subsequent behavioral assay (Supplementary  
112 Fig. 2A-E). Next, we performed positive controls to ensure our results generalized across activity  
113 detection paradigms. In these experiments, preferential suprapyramidal blade activation was seen  
114 following endogenous Fos labeling (Supplementary Fig. 2F), as well as using other IEG targets  
115 (e.g., *Arc*: Supplementary Fig. 2G) (see also Chawla et al., 2005; Chawla et al., 2018; Penke et  
116 al., 2011; Ramirez-Amaya et al., 2005). Finally, we ensured that infrapyramidal blade GCs could  
117 be induced to express Fos by exogenous stimulation (Supplementary Fig. 2H) (see also Chawla  
118 et al., 2005). In collection, these controls suggest *bona fide* activity differences underlie  
119 suprapyramidal-blade-enriched behavioral labeling (Fig. 1).

120

### 121 *The suprapyramidal blade preferentially exhibits displaced granule cells*

122 As our activity-recruited cells were both enriched in the suprapyramidal blade and  
123 exhibited cell bodies “displaced” into the ML (e.g., Fig. 1D), we hypothesized that there was an  
124 inherent blade-specific difference in displaced GCs. Consistent with this, *in situ* hybridization  
125 (ISH) and immunohistochemical (IHC) labeling of GCs revealed that vast majority of displaced  
126 GCs were found in the suprapyramidal blade (ISH: Fig. 2A, IHC: Fig. 2B; n=114/127, 89% and  
127 n=116/132, 90%, of displaced cells were associated with the suprapyramidal blade with ISH and  
128 IHC respectively). Similar results could be seen for other markers of GCs (e.g., *Prox1* and  
129 *Slc17a7*, Supplementary Fig. 3A,B). This revealed a previously unidentified and prominent  
130 difference in the blades of the DG under naïve, physiological conditions.

131 Given the pronounced differences in the number of displaced GC between the two blades,  
132 in conjunction with the fact that GCs are born in a deep-to-superficial fashion (Angevine, 1965;  
133 Save et al., 2019), we further hypothesized that such differences may have a developmental  
134 origin. To resolve this, we performed birthdate labeling of DGs, injecting AAV2-CAG-FLEX-

135 tdTomato into the GC-selective Rbp4-cre line (Cembrowski et al., 2016b) at different time points  
136 *in utero*. Labeled neurons following injections at e15 and e16 primarily exhibited properties of  
137 the “displaced” GC population: such cells exhibited atypical morphologies, with cell bodies  
138 bordering or within the molecular layers (Fig. 2C; cf. Fig. 1D). In stark contrast to this, labeled  
139 neurons following e17 injections were much more uniformly distributed across blades, and  
140 exhibited much less cell-body displacement outside of the GCL (Fig. 2C,D). In total, this  
141 illustrated a developmental origin consistent with the blade-specific GC displacement in  
142 maturity.

143

#### 144 *Activity-labeled granule cells are consistent with semilunar granule cells*

145 The displaced cell body location and broader dendritic branching of activity-labeled GCs  
146 resemble features of so-called semilunar granule cells (SLGCs) (Williams et al., 2007). In  
147 addition to these anatomical/morphological properties, SLGCs also have a markedly lower input  
148 resistance relative to classical GCs (Williams et al., 2007). Motivated by this previous work, we  
149 next used *ex vivo* morphological and electrophysiological techniques to identify the relationship  
150 between activity-labeled cells (defined by tdTomato expression) and SLGCs (previously defined  
151 according to morphological and electrophysiological criteria: Gupta et al., 2012; Larimer and  
152 Strowbridge, 2008, 2010; Save et al., 2019; Williams et al., 2007).

153 In mice that were exposed to a novel environment and activity tagged (as in Fig. 1A-D),  
154 we performed whole-cell recordings from both tdTomato-negative and tdTomato-positive cells  
155 in *ex vivo* brain slices (Fig. 3A,B). Recorded cells were filled with biocytin, allowing *post hoc*  
156 morphological reconstruction and analysis. Notably, tdTomato-positive cells typically exhibited  
157 differences in morphological and electrophysiological properties relative to tdTomato-negative  
158 cells (e.g., dendritic span, Fig. 3C; input resistance, Fig. 3D; see Table S1 for full summary of  
159 measured parameters and statistical tests). All of these features recapitulated previously  
160 described differences between SLGCs and classical granule cells (Larimer and Strowbridge,  
161 2008, 2010; Williams et al., 2007), with tdTomato-positive cells corresponding to SLGCs in  
162 particular.

163 Note that a perfect one-to-one correspondence between activity-labeled cells and SLGCs  
164 would not be expected: it is likely that some SLGCs are not recruited by novel environment  
165 exploration, whereas some classical GCs are recruited by this exploration. To investigate this, we  
166 performed a cluster analysis on our dataset. We found clusters largely agreed with activity

167 labeling, and in particular suggested that putative SLGCs represented ~80% of the recruited cells  
168 (n=13/16 of tdTomato-expressing cells corresponded to one cluster: Fig. 3E).

169

### 170 *A distinct, discrete Penk-expressing subtype in the suprapyramidal blade*

171 Motivated by activity labeling potentially having a subtype-specific basis, we next sought  
172 to identify whether GC heterogeneity adhered to a continuum or reflected discretely separated  
173 subclasses (Cembrowski and Menon, 2018). To do this in a quantitatively rigorous fashion, we  
174 analyzed a previously published single-cell RNA-seq (scRNA-seq) dataset that included 498  
175 cells from the dentate gyrus (Habib et al., 2016). Combining nonlinear t-SNE visualization with  
176 graph-based clustering, we identified seven distinct DG cell classes (Fig. 4A). From these seven  
177 classes, four expressed marker genes associated with DG GCs (e.g., excitatory cell marker  
178 *Slc17a7* and GC marker *Prox1*, Fig. 4B-D; see also Supplementary Fig. 3C-H).

179 Within the GC dataset, a small and putatively rare *Penk*-expressing population was  
180 discretely separated from a broader collection of *Cck*-expressing cells (Fig. 4E,F). In addition to  
181 differences in these peptidergic markers, these populations also varied by a host of other  
182 functionally relevant genes, including those that regulate axon guidance and cell adhesion (*Slit1*,  
183 *Col6a1*), G protein signaling (*Rgs4*), cytoskeletal properties (*Nefm*), calcium binding (*Necab3*),  
184 and voltage-gated channels (*Scn3b*) (Supplementary Fig. 3I). Thus, it is likely that these two  
185 putative subtypes would vary in a host of higher-order properties, consistent with our previous  
186 results (Figs. 1-3). Notably, these differences were not explained by variation in the dorsal-  
187 ventral axis (Supplementary Fig. 3J,K), nor by maturity state (Supplementary Fig. 3L, in  
188 agreement with Fig. 2C), suggesting that a different feature might covary with these gene-  
189 expression differences.

190 Consequently, we examined whether the rare *Penk*-expressing population might  
191 correspond to the blade-enriched GC population. Remarkably, ISH labeling of *Penk*-expressing  
192 cells was found to be sparse, biased to cells near or within the molecular layers, and enriched in  
193 the suprapyramidal blade (Fig. 4G; 79% of labeled cells in suprapyramidal blade; n = 457/579  
194 cells). Using two-color single-molecule fluorescent ISH (smFISH), we confirmed that *Penk* and  
195 *Cck* labeled nonoverlapping populations, in agreement with these peptidergic markers labeling  
196 discrete subtypes of GCs (92.5% of labeled cells exhibited mutually exclusive expression of  
197 either *Penk* or *Cck*, n = 414/458 counted cells). In particular, the *Penk*-expressing population  
198 labeled a rare subtype of GC, as expected from scRNA-seq (Fig. 4H,I; *Penk*-expressing neurons

199 represented ~4.6% of all GCs, n=69/1498 counted cells; cf. 6.6% of all GCs in scRNA-seq  
200 dataset, n=25/380 in Fig. 4F).

201

### 202 *Penk-expressing granule cells are selectively recruited in behavior*

203         Given the suprapyramidal blade enrichment and ML-displacement of *Penk*-expressing  
204 GCs, we sought to investigate whether this subclass preferentially participated in hippocampal-  
205 associated behavior (Fig. 1). As with previous behavioral experiments (Fig. 1B), cells were  
206 permanently labeled in response to novel environment exposure (Fig. 4J), with animals later  
207 sacrificed for smFISH subtype-specific identification. Remarkably, *Penk*-expressing cells  
208 exhibited a much higher propensity to be incorporated into active ensembles ( $72 \pm 13\%$  of  
209 activity-labeled cells exhibited *Penk* expression in six animals, mean  $\pm$  SD, cf.  $5.2 \pm 4.0\%$   
210 expected by chance,  $p = 1.1e-5$ , Fig. 4K,L). Thus, cells activated by novel environment  
211 exploration largely conformed to a subclass of GCs expressing *Penk*, exhibiting a recruitment  
212 rate similar to SLGCs (cf. ~80%, Fig. 3E) and at an order of magnitude greater than predicted by  
213 prevalence alone (cf. *Penk*-expressing GCs comprising ~5% of all mature GCs, Fig. 4D,H).

214

## 215 **DISCUSSION**

216         Although GCs are frequently examined as a model system for understanding the cellular  
217 underpinnings of memory, whether GC function can be interpreted and predicted according to  
218 GC subtypes remains uncertain. Our work here illustrates that the DG contains a pre-existing GC  
219 subtype that is suprapyramidal-blade-enriched and preferentially recruited during hippocampal-  
220 associated behavior (Figs. 1, 2). Such blade-enriched recruited cells display hallmarks of the  
221 atypical semilunar GCs, including a distinct morphology, cell body location, and  
222 electrophysiology (Fig. 3). This subtype is discretely separable from classical mature GCs  
223 according gene expression, and although quantitatively rare relative to classical GCs, constitutes  
224 the majority of all GCs recruited during behavior (Fig. 4). In total, our work here provides  
225 unexpected subtype-specific underpinnings of GC structural and functional variability, and will  
226 help to guide and interpret future experiments on the cellular basis of memory.

227

### 228 *Subtype-specific interpretation of non-uniform granule cell recruitment*

229         A hallmark of granule cells is their low level of activity for a given environment  
230 (GoodSmith et al., 2017; Jung and McNaughton, 1993; Neunuebel and Knierim, 2012; Senzai

231 and Buzsaki, 2017; Skaggs et al., 1996). When the same neurons are studied across  
232 environments, a small subset of granule cells accounts for most activity (Mizuseki and Buzsaki,  
233 2013), with the mechanisms underlying this functional selectivity being unknown. Our findings  
234 here suggest this can be accounted for by GC subtype-specific contributions: the *Penk*-  
235 expressing GC subtype identified here accounts for 5% of the total GC population but for ~70-  
236 80% of the recruited GCs (Figs. 3, 4). In total, this amounts to *Penk*-expressing GCs being  
237 recruited at a frequency more than ten-fold predicted by prevalence alone, and comprising the  
238 majority of all recruited GCs.

239         The properties of this subtype-privileged recruitment are consistent with multiple other  
240 bodies of work. Recent correlative electrophysiology-morphology, combining juxtacellular  
241 recordings with morphological reconstructions of GCs, revealed that active GCs exhibit more  
242 complex dendritic arbors (Diamantaki et al., 2016) (see also Claiborne et al., 1990). In a  
243 complementary study using RNA-seq, *Penk* expression was found to be enriched in DG engram  
244 cells (Rao-Ruiz et al., 2019). These findings agree with the activity-biased DG subtype  
245 identified, which are characterized by morphologically complex dendritic arbors (Fig. 3) and  
246 *Penk* marker-gene expression (Fig. 4). In total, the subtype-specific organization uncovered here  
247 helps to provide a provide a framework to interpret these previous recruitment results.

248         The finding that a relatively rare subtype of GC dominates DG activity, while consistent  
249 with previous literature (Jung and McNaughton, 1993; Mizuseki and Buzsaki, 2013; Neunuebel  
250 and Knierim, 2012; Skaggs et al., 1996), is enigmatic. At first pass, this might suggest the overall  
251 computational capabilities of the dentate gyrus are much more limited than a raw count of GC  
252 would predict. However, such GC activity disparities may underscore a functional role: the  
253 *Penk*-expressing granule cells identified here may be sufficient to convey rapid and coarse  
254 features of the environment, whereas sparsely active classical granule cells may convey more  
255 nuanced information (Buzsaki and Mizuseki, 2014). In this way, the intrinsic architecture of the  
256 DG may support multiscale operations that provide computational and behavioral flexibility.

257

### 258 *Discovery and implications of blade-specific heterogeneity*

259         Previous functional work, assaying activity via IEG labeling, has shown that the  
260 suprapyramidal blade is preferentially recruited during novel environment exploration  
261 (Chawla et al., 2005; Chawla et al., 2018; Guenther et al., 2013; Penke et al., 2011). Such  
262 phenomenology could emerge from underlying cell-intrinsic and/or circuit differences between



263 the blades of the DG. Our work here, revealing a preexisting GC subtype that is predisposed to  
264 recruitment, provides evidence for a cell-intrinsic mechanism. That such blade-specific activity  
265 is intrinsic, rather than reflecting long-range circuit inputs, is also in keeping with the lack of  
266 projection differences between the blades (Scharfman, 2007; van Groen et al., 2003; but see  
267 Wyss et al., 1979). It is important to note that local microcircuitry contributions, such as local  
268 excitatory IML recurrent connections from semilunar axon collaterals (Williams et al., 2007) or  
269 local inhibitory interneurons (Seress and Pokorny, 1981), may also augment and further amplify  
270 such cell-intrinsic differences.

271 Such blade-specific heterogeneity has important methodological implications for  
272 assaying GC activity going forward. With *in vivo* imaging technology becoming increasing  
273 available in neuroscience (Cai et al., 2016), it is critical to note that typically such technologies  
274 are used to interrogate only the suprapyramidal blade, and therefore likely provide a subtype-  
275 enriched interpretation of GC dynamics. Complementary techniques that allow concurrent  
276 activity readouts of both blades, such as IEG labeling or multisite electrophysiology, can  
277 circumvent this issue and will allow a more generalizable understanding of GC activity.

278 In addition to illustrating the existence of this across-blade heterogeneity, our results also  
279 provide a means of assaying the corresponding subtype-specific functional relevance. The  
280 marker genes identified here, *Penk* and *Cck*, provides a histological means of tagging non-  
281 canonical and canonical GCs for subtype-specific interpretation (e.g., Fig. 4). Complementing  
282 these observational experiments, transgenic animals that leverage the specific expression of these  
283 genes will enable interventional experiments and inference of causal relationships (Daigle et al.,  
284 2018; Harris et al., 2014; Taniguchi et al., 2011). Thus, the results here open multiple avenues  
285 for unraveling the subtype-specific rules of hippocampal-dependent memory and function.

286

## 287 **FIGURE LEGENDS**

288 **Fig. 1. Granule cells of the suprapyramidal blade of the dentate gyrus are preferentially**  
289 **activated across a range of behavioral paradigms.**

290 A. Atlas illustrating the blades of the DG in a coronal section. Modified from (Paxinos and  
291 Franklin, 2004). B. Schematic of tdTomato labeling of cells active during novel environment  
292 exploration. C. Optical section of tdTomato labeled cells following NE exploration. C(i) depicts  
293 overview, whereas C(ii) and C(iii) depict expansions of the suprapyramidal and infrapyramidal  
294 blades, respectively. Arrows denote labeled cell bodies with morphologies consistent with GCs.

295 Scale bars: 200, 100, and 100  $\mu\text{m}$ , respectively. D. Labeled cells were positive the DG GC  
296 markers Prox1 and Pcp4, as assayed via immunohistochemistry. Dashed line denotes boundary  
297 between inner molecular layer (IML) and granule cell layer (GCL). Scale bar: 5  $\mu\text{m}$ . E-I. As in  
298 C(ii,iii), but for a variety of behavioral paradigms. Scale bar: 100  $\mu\text{m}$ . J. Summary of the number  
299 of labeled cells, per 100  $\mu\text{m}$ -thick section, for the two blades of the dentate gyrus. Central  
300 tendency and error bars denote mean  $\pm$  SEM.

301

302 **Fig. 2. The blades of the dentate gyrus exhibit mature and birthdate differences.**

303 A. Left: ISH for the DG marker gene *Pcp4*. Scale bar: 200  $\mu\text{m}$ . Right: magnification of the  
304 suprapyramidal and infrapyramidal blades. Note the suprapyramidal blade is prominently  
305 enriched for *Pcp4*-expressing cell bodies displaced into the MLs. Scale bar: 100  $\mu\text{m}$ . B. As in  
306 (A), but for IHC detection of Pcp4 protein. C. Top row: Labeled granule cells in mature mice  
307 following birthdate labeling of neurons using *in utero* viral injections (IUVIs) at e15, shown in  
308 both overview (left) and expansion of the suprapyramidal blade (right). Scale bars, left and right:  
309 100  $\mu\text{m}$  and 25  $\mu\text{m}$ . Bottom row: as in top row, but for *in utero* viral injections at e17. D.  
310 Summary of labeled cells across e15, e16, and e17 injection time points. Individual data points  
311 represent results from individual animals, and red lines with error bars reflect mean  $\pm$  SEM for  
312 each time point.

313

314 **Fig. 3. Activity-labeled neurons are consistent with semilunar granule cells.**

315 A. Top: Example morphology of a tdTomato-negative granule cell, recorded via whole-cell patch  
316 clamp *ex vivo*. Dendritic span, defined as the distance between the two outermost dendrites at 50  
317  $\mu\text{m}$  above the initial bifurcation of primary dendrite, is shown. Scale bar: 50  $\mu\text{m}$ . Bottom:  
318 Example voltage responses following current step injection for the same cell. B. As in (A), but  
319 for a tdTomato-positive granule cell. C,D. Example of morphological (dendritic span, C) and  
320 electrophysiological (input resistance, D) properties of tdTomato-negative and tdTomato-  
321 positive cells. See Table S1 for full list of measured parameters and statistical tests. E. Two-  
322 parameter scatterplot of input resistance and dendritic span, illustrating separation that is  
323 recapitulated by k-means clustering (green and magenta points, inset).

324

325 **Fig. 4. The DG embeds a sparse, blade-enriched discrete GC subtype that is preferentially**

326 **recruited during behavior.**

327 A. tSNE visualization of scRNA-seq transcriptomes from the dentate gyrus. Colors denote  
328 different clusters of cells. B. Expression of *Slc17a7*, a marker of excitatory neurons.  
329 C. Expression of *Prox1*, a marker of GCs. D. Deconstruction of the scRNA-seq landscape into  
330 GCs and other cell types. E,F. Within the GC population, two subtypes of GCs can be identified  
331 based upon mutually exclusive expression of *Cck* and *Penk*. G. Single-color ISH of *Cck* and  
332 *Penk*. Scale bar: 100  $\mu\text{m}$ . H,I. Overview (H) and magnification (I) of two-color smFISH of *Cck*  
333 and *Penk*. Scale bars: 50  $\mu\text{m}$  and 10  $\mu\text{m}$ . J. Illustration of behavioral paradigm to compare  
334 activity-labeled cells with *Penk*-expressing cells. K. Representative images of overlap between  
335 activity-labeled cells and *Penk*-expressing cells. Scale bar: 50  $\mu\text{m}$ . L. Quantification of activity-  
336 labeled cells that also express *Penk*.

337

338 **Supplemental Fig. 1. Representative depiction of activity-labeled cells and dendrites.**

339 Related to Figure 1.

340 Top: maximum intensity projection giving overview of activity-labeled cells in the  
341 suprapyramidal blade. Note displaced cell bodies and the presence of dendritic spines. Middle:  
342 expansion on a labeled cell. Bottom: expansion on labeled dendrites. Scale bars: 100, 10, and 20  
343  $\mu\text{m}$ , respectively.

344

345 **Supplemental Fig. 2. Control activity-labeling experiments.** Related to Figure 1.

346 A. Representative image showing absence of labeling following vehicle injections. Scale bar:  
347 500  $\mu\text{m}$ . B. Representative image showing activity-tagged cells for an animal in homecage. C.  
348 Representative image showing activity-tagged cells for an animal transported to the behavior  
349 room and handled, but not put through a behavioral paradigm. Arrows indicate activity-tagged  
350 (tdTomato-expressing) GCs in (A-C). D. Summary of negative control data (n=2 mice for  
351 vehicle injections, n=3 mice for each of homecage and behavior room transfer). E. For  
352 comparison to (D), summary of animals put through behavioral paradigms (as in Fig. 1J).  
353 Individual lines reflect individual animals, lines with error bars reflect pooled mean  $\pm$  SEM, and  
354 statistical comparisons represent Mann-Whitney U-tests. F. Representative image showing  
355 preferential suprapyramidal labeling following novel environment exploration, as assayed  
356 through cFos IHC. Arrows indicate cFos+ cells in the granule cell layer and molecular layers.  
357 Note in general, the suprapyramidal was associated with 80% of cFos-labeled cells (n = 80/100

358 cells, 2 animals and 2 sections per animal). Scale bar: 200  $\mu\text{m}$ . G. Representative image showing  
 359 preferential suprapyramidal blade labeling following novel environment exploration, as assayed  
 360 through *Arc* ISH. Arrows indicate *Arc*-expressing cells in the granule cell layer and molecular  
 361 layers. Note that, in general, the suprapyramidal was associated with 70% of *Arc*-labeled cells (n  
 362 = 276/395 cells, 2 animals and 6 sections per animal). H. Upper left: DAPI image of the  
 363 infrapyramidal blade of the dentate gyrus. Upper right: mCherry expression, corresponding to  
 364 injection of AAV2-hSyn-DIO-hM3D(Gq)-mCherry into the DG of Rbp4-cre mice. Lower left:  
 365 immunohistochemical staining of cFos. Similar broad staining of the outer blade of the dentate  
 366 gyrus was seen in 2 other animals. Lower right: overlay of all panels. Scale bar: 100  $\mu\text{m}$ .

367

368 **Supplemental Fig. 3. Gene expression in the dentate gyrus.** Related to Figures 2 and 4.

369 A. Left: overview of *Prox1* expression in the dentate gyrus, a marker of granule cells. Scale bar:  
 370 500  $\mu\text{m}$ . Right: expansion of the suprapyramidal (top) and infrapyramidal (bottom) blades. Scale  
 371 bar: 100  $\mu\text{m}$ . Note suprapyramidal blade enrichment of displaced granule cells. B. As in (A), but  
 372 for the excitatory neuron marker gene *Slc17a7*. C. t-SNE visualization of single-cell  
 373 transcriptomes, with coloring denoting cluster identity. D-G. Expression of the excitatory neuron  
 374 marker *Slc17a7* (D), the DG GC marker *Prox1* (E), the inhibitory interneuron marker *Gad2* (F)  
 375 and the glial marker *Slc1a2* (G). H. Cell-type-specific labeling of DG cell transcriptomes.  
 376 I. Expression of subtype-enriched marker genes with neuronally relevant functional correlates.  
 377 J,K,L. Expression of the dorsal DG marker gene *Lct* (J), the ventral marker gene *Trhr* (K), and  
 378 the immature granule cell marker *Dcx* (L). Note that expression of each marker gene in (J,K,L) is  
 379 dispersed across the GC clusters rather than exhibiting structured expression.

380

381 **Supplemental Table 1. Morphological and electrophysiological properties of active and**  
 382 **inactive granule cells.** Related to Figure 3.

|                | Resting membrane potential (mV) | Input resistance (M $\Omega$ ) | AP amplitude (mV) | AP half width (ms) | AP threshold (mV) | Adaptation ratio | AHP amplitude (mV) | Dendritic span ( $\mu\text{m}$ ) |
|----------------|---------------------------------|--------------------------------|-------------------|--------------------|-------------------|------------------|--------------------|----------------------------------|
| tdTomato-      | -79.0 $\pm$ 0.9                 | 434 $\pm$ 26                   | 112.8 $\pm$ 2.2   | 0.993 $\pm$ 0.030  | -35.9 $\pm$ 0.7   | 0.30 $\pm$ 0.04  | 12.7 $\pm$ 1.0     | 71 $\pm$ 7                       |
| tdTomato+      | -78.8 $\pm$ 1.0                 | 267 $\pm$ 21                   | 113.3 $\pm$ 3.6   | 0.972 $\pm$ 0.050  | -37.9 $\pm$ 1.8   | 0.46 $\pm$ 0.09  | 14.5 $\pm$ 1.4     | 93 $\pm$ 7                       |
| <i>p</i> value | 0.9288                          | <0.0001                        | 0.8987            | 0.7164             | 0.2865            | 0.1043           | 0.2590             | 0.0367                           |

383

384 Number of neurons n=26 tdTomato- and 23 tdTomato+ for resting membrane potential and input  
385 resistance measurements; for the rest of the electrophysiological properties, n=22 tdTomato- and  
386 19 tdTomato+; for the dendritic span n = 12 tdTomato- and 16 tdTomato+.

387

## 388 **ACKNOWLEDGEMENTS**

389 The authors would like to thank members of the Cembrowski and Spruston laboratories, as well  
390 as Annie Vogel Ciernia and Jason Snyder, for helpful discussion and comments on the  
391 manuscript. Funding was provided by the University of British Columbia (Department of  
392 Cellular and Physiological Sciences, Djavad Mowafaghian Centre for Brain Health, and the  
393 Faculty of Medicine Research Office), the Natural Sciences and Engineering Resource Council  
394 of Canada (RGPIN-2019-04507), and the Howard Hughes Medical Institute.

395

## 396 **METHODS**

397 Experimental procedures were approved by the Institutional Animal Care and Use Committee at  
398 the University of British Columbia and the Janelia Research Campus.

399

### 400 *Mouse behavior, activity tagging, and quantification*

401 To label cells active during behavior (Fig. 1), we used a transgenic mouse system that  
402 enables permanent tagging of transiently active neurons ("FosTRAP" mice: Guenther et al.,  
403 2013). FosTRAP mice were crossed to Ai14 (tdTomato Cre-reporter) mice (Madisen et al.,  
404 2010), which induces tdTomato expression in active neurons following 4-hydroxytamoxifen (4-  
405 OHT) administration.

406 Double-positive mature male mice that received at least three sequential days of transfer  
407 and handling in the experiment room were used for behavioral experiments. For novel  
408 environment exploration, mice were added to an operant chamber (10.2 in width x 12.6 in length  
409 x 8.3 in height) and allowed to explore for 20 minutes. For footstock conditions, mice were  
410 placed in an operant chamber and two footshocks were applied (2 s, 0.7 mA; shocks occurring at  
411 2.5 and 3.5 minutes after introduction), and removed after 20 minutes. For novel object  
412 experiments, a small plastic toy was added to a mouse's homecage, and removed after 20  
413 minutes. For novel odor experiments, a cage lid was wiped down with diluted (1:10) peppermint  
414 extract, and swapped with the homecage lid for 20 minutes. For experiments involving  
415 introduction of a conspecific, male co-housed littermates were individually housed for 3 days,

416 reintroduced into a new homecage for 20 minutes, and subsequently single-housed. For forced  
417 swim, mice were placed in a clear acrylic cylinder (12 in height x 10 in diameter) half-filled with  
418 warm water and removed after 5 minutes.

419 Five to fifteen minutes after behavior, 4-hydroxytamoxifen (4-OHT) was administered  
420 intraperitoneally to induce tdTomato expression in active neurons (performed as described in  
421 Guenther et al., 2013). After allowing 5-7 days for tdTomato expression, mice were  
422 subsequently sacrificed, via deep anesthesia with isoflurane and perfusion with phosphate-  
423 buffered saline (PBS) followed by 4% paraformaldehyde (PFA) in 0.1M PB. Brains were  
424 dissected and post-fixed in 4% PFA overnight. Brain sections (100  $\mu$ m) were made using a  
425 vibrating tissue slicer (Leica VT 1200S, Leica Microsystems, Wetzlar, Germany). Neurons  
426 occupying the granule cell layer or molecular layers, exhibiting a polarized morphology  
427 consistent with granule cells, were manually counted around the intermediate dentate gyrus (~-  
428 3.0 mm to bregma). Cells were counted from at least four sections for each animal. At least three  
429 animals were used for each behavioral paradigm. Summary statistics are presented as mean  $\pm$   
430 SEM, with paired Mann-Whitney U tests performed to analyze differences across blades.

431 To control and help interpret this activity labeling, three sets of negative control  
432 experiments were performed (Supplementary Fig. 2A-E). For vehicle control injections, mice  
433 received saline rather than 4-OHT following novel environment exposure. For homecage control  
434 experiments, mice received 4-OHT within their homecage in their holding room. For behavior  
435 room transfer and handle experiments, animals that had received three days of transfer and  
436 handling in the experimental room received 4-OHT following a fourth day of transfer and  
437 handling in the experimental room.

438

### 439 *Immunohistochemistry*

440 Mature male mice were deeply anesthetized with isoflurane and perfused with 1x PBS  
441 followed by 4% PFA in in 0.1M PB. Brains were dissected and post-fixed in 4% PFA overnight.  
442 Brain sections (100  $\mu$ m) were made using a vibrating tissue slicer (Leica VT 1200S, Leica  
443 Microsystems, Wetzlar, Germany). Antibodies used in this study were as follows: rabbit  
444 antibody to c-Fos (1:500, #2250, Cell Signaling Technology; RRID: AB\_2247211), mouse  
445 antibody to Prox1 (1:1000, ab92825, Abcam; AB\_10563321), rabbit antibody to Pcp4 (1:250,  
446 HPA005792, Millipore Sigma; RRID: AB\_1855086).

447 Immunohistochemistry was performed on free-floating sections. All tissue was washed 5  
448 times (5 minutes each) in PBS and then incubated in blocking buffer (5% NGS in 0.3% Triton-  
449 PBS) for one hour at room temperature. Tissue was subsequently incubated in primary antibody  
450 at 4°C overnight, washed 5 times (5 minutes each) in 0.3% Triton-PBS, and detected by Alexa  
451 Fluor secondary antibodies (Thermo Scientific Inc., Waltham, MA) by incubating at room  
452 temperature for 1-2 hours. Sections were subsequently washed in PBS five times (5 minutes  
453 each), mounted, and coverslipped with mounting media containing DAPI (H-1200, Vector  
454 Laboratories, Burlingame, CA). Cell bodies were manually counted, as done for quantification of  
455 transgenic-tagged cells.

456

#### 457 *In situ hybridization*

458 To prepare tissue for single-molecule fluorescent *in situ* hybridization (ISH), mature male  
459 mice were deeply anesthetized with isoflurane and perfused with 1x PBS followed by 4% PFA in  
460 0.1M PB. Brains were dissected and post-fixed in 4% PFA for 2-4 hr. Brain sections (20 µm)  
461 were made using a cryostat tissue slicer (Leica 3050S, Leica Microsystems, Wetzlar, Germany)  
462 and mounted on glass slides. Slides were subsequently stored at -80°C until use.

463 Custom probes for *Arc* (316911-C3), *Cck* (402271), and *Penk* (318761-C2) were ordered  
464 from Advanced Cell Diagnostics (ACD, Hayward, CA). Antigen retrieval, pretreatment,  
465 hybridization, amplification, and detection were performed according to User Manual for Fixed  
466 Frozen Tissue (ACD) (Wang et al., 2012). Cell bodies were manually counted, as done for  
467 quantification of transgenic-tagged cells. For two-color quantification of *Cck* and *Penk*  
468 expression (Fig. 4H,I), only cells at the GCL-IML border or beyond were examined, as the dense  
469 crowding of cells within the GCL precluded segmentation. For comparing activity-labeled *Penk*-  
470 expressing cells to that expected by chance, the mean number of tdTomato cells and the mean  
471 rate of *Penk* labeling were empirically obtained, and 1,000,000 Monte Carlo simulations were  
472 performed where the number of tdTomato-expressing cells were stochastically assigned *Penk*  
473 expression based upon chance levels. Statistical significance was assessed by a Mann-Whitney U  
474 test, comparing Monte Carlo simulations to empirical values found for 6 animals.

475 Coronal sections from the Allen Mouse Brain Atlas (AMBA) (Lein et al., 2007) were  
476 used to perform single-color colorimetric ISH examination of blade-specific differences and  
477 scRNA-seq predictions. When quantification was used, cell bodies were manually counted, as

478 done for quantification of transgenic-tagged cells. The genes (experiments) used were *Pcp4*  
479 (79912613), *Prox1* (73520980), *Slc17a7* (70436317), *Cck* (77869074), and *Penk* (74881286).

480

#### 481 *Surgeries and viral injections*

482 For activation of granule cells, the DREADD virus AAV2-hSyn-DIO-hM3D(Gq)-  
483 mCherry (UNC Gene Therapy Center Vector Core) was injected bilaterally into the dentate  
484 gyrus in mature *Rbp4-cre* KL100 male mice (RRID: MMRRC\_031125-UCD) (Gerfen et al.,  
485 2013) via stereotactic surgery. This line provides selective access to granule cells (Cembrowski  
486 et al., 2016b). Injections were located at A/P, M/L, (D/V) -3.3, 2.5, (-4, -3.25, -2.5), and -3.0,  
487 2.0, (-4, -3.25, -2.5), with 80 nL of virus injected at each site. To drive activation, Clozapine N-  
488 Oxide (CNO) (BML-NS105, Enzo Life Sciences, Farmingdale, NY, and #4936, Tocris, Bristol,  
489 UK) was dissolved in sterile, injectable saline containing 0.5% DMSO. This solution was  
490 injected intraperitoneally at 5 mg/kg. For birthdate labeling of granule cells, *in utero* viral  
491 injections of AAV2-CAG-FLEX-tdT were performed as described previously (Cembrowski et  
492 al., 2016a) into pregnant *Rbp4-cre* KL100 female mice. Cell bodies were manually counted, as  
493 done for quantification of transgenic-tagged cells.

494

#### 495 *Mouse hippocampal slice preparation, recording, and morphological analysis*

496 Mature (2- to 4-month-old) FosTRAP x Ai14 mice underwent novel environment  
497 exposure and 4-OHT administration, as in behavioral experiments. One week after this, mice  
498 were anesthetized with isofluorane and decapitated. The brain was extracted and transferred to  
499 ice-cold dissection solution containing (in mM): 80 NaCl, 24 NaHCO<sub>3</sub>, 25 dextrose, 75 sucrose,  
500 2.5 KCl, 1.25 NaH<sub>2</sub>PO<sub>4</sub>, 0.5 CaCl<sub>2</sub>, 5 MgCl<sub>2</sub>, 1 ascorbic acid, 3 Na-pyruvate. The solution was  
501 saturated with 95% O<sub>2</sub> and 5% CO<sub>2</sub>. 300 μm thick coronal hippocampal slices were cut using a  
502 vibratome (VT1200S Leica, Germany), then hemisected and placed in artificial cerebral spinal  
503 fluid (ACSF) containing (in mM): 126 NaCl, 2.5 KCl, 1.2 MgCl<sub>2</sub>, 2.4 CaCl<sub>2</sub>, 1.2 NaH<sub>2</sub>PO<sub>4</sub>, 11.4  
504 glucose, 21.4 NaHCO<sub>3</sub>, 1 ascorbic acid, and 3 Na-pyruvate saturated with 95%O<sub>2</sub> and 5%  
505 CO<sub>2</sub> (pH 7.4) and maintained at 32°C. Slices were placed in a submersion-type recording  
506 chamber perfused with ACSF at 32°C. Slices were visualized on an upright microscope  
507 (BX61WI; Olympus, Tokyo, Japan) equipped with infrared-differential interference contrast  
508 optics. The recording pipettes (4–9 MΩ resistance) were filled with internal solution containing  
509 (in mM): 130 K-gluconate, 10 KCl, 10 Na<sub>2</sub>-phosphocreatin, 10 HEPES, 4 Mg-ATP, 0.3 Na-GTP,



510 and 0.2% biocytin (pH 7.2, osmolarity 295). Current-clamp experiments in brain slices were  
511 performed with whole-cell patch-clamp recordings using a Multiclamp 700B amplifier  
512 (Molecular Devices, San Jose, CA). Electrophysiological data were low-pass-filtered with a cut-  
513 off frequency of 10 kHz and digitized at 20 kHz via a USB-6343 board (National Instruments,  
514 Austin, TX) under the control of WaveSurfer software ([https://www.janelia.org/open-](https://www.janelia.org/open-science/wavesurfer)  
515 [science/wavesurfer](https://www.janelia.org/open-science/wavesurfer)). Bridge balance and capacitance compensation were performed at the  
516 beginning of recordings. After current-clamp recording, cells were kept in whole-cell mode for  
517 30 minutes to allow sufficient biocytin filling of the cell, slices were then fixed in 4% PFA and  
518 recorded cells were subsequently detected with an Alexa Fluor 488/streptavidin reaction.

519 Analysis was performed in Matlab (MathWorks, Natick, MA) with custom scripts.  
520 Action potential (AP) amplitude and threshold were calculated as the smallest current in protocol  
521 that induced APs (typically 100 – 200 pA). AP was defined as the different in voltage between  
522 peak of AP and the resting potential. Adaptation ratio was defined as the interspike interval (ISI)  
523 between the first two APs, divided by ISI between the last two APs, within a 2-second 200 pA  
524 current injection. Afterhyperpolarization (AHP) was calculated as the difference between the AP  
525 trough and the threshold of the AP at 200 pA current injection. Dendritic span was measured as  
526 the distance between the two outermost dendrites at 50  $\mu\text{m}$  above the initial bifurcation of  
527 primary dendrite, or center of soma if there are multiple primary dendrites in ImageJ (Schindelin  
528 et al., 2012). Clustering analysis based on dendritic span and input resistance was done using the  
529 k-means clustering algorithm in Matlab. The average percentage of tdTomato positive cells that  
530 belongs to a single cluster is 81.3% (averaged value of 1000 calculations using different random  
531 number seeds). To verify the robustness of clustering based on dendritic span and input  
532 resistance, we performed k-mean clustering for all cells with all electrophysiological properties  
533 measurements. The average percentage of tdTomato positive cells that belongs to a single cluster  
534 is 94.7% (1000 simulations).

535

### 536 *Single-cell RNA-seq analysis*

537 Computational analysis was performed in R (R Development Core Team, 2008) using a  
538 combination of Seurat v1.4.0.16 (Satija et al., 2015) and custom scripts (Cembrowski et al.,  
539 2018a; Cembrowski et al., 2018b). Data from a previously published scRNA-seq was used  
540 (Habib et al., 2016), with cells annotated as taken from the dentate gyrus used for the analysis  
541 here (i.e., those tagged as “DG” from the DATA\_MATRIX\_LOG\_TPM.txt data file). Data were

542 transformed from log to linear space and loaded via *Setup(min.cells=3, min.genes=200,*  
543 *do.logNormalize=T, total.expr=10000)*. Subsequent analysis proceeded via default parameters  
544 used in the Seurat package. Graph-based clustering was performed on using dimensionally  
545 reduced data via principal component analysis, and differential expression between subtypes was  
546 assayed via non-parametric Wilcoxon rank sum test. When plotting gene expression in tSNE  
547 plots, color ranges from white (zero expression) to red (maximal expression), plotted  
548 logarithmically. All analysis scripts will be available upon acceptance or reviewer request.

549

### 550 *Fluorescence Imaging*

551 Images were acquired with a confocal microscope (LSM 880, Carl Zeiss Microscopy,  
552 Jena, Germany) using a 20x or 40x objective. Some images were postprocessed in Fiji, including  
553 brightness adjustments applied to the entire image, as well as pseudocoloring to facilitate visual  
554 comparisons across channels.

555

556 **REFERENCES**

- 557
- 558 Angevine, J.B., Jr. (1965). Time of neuron origin in the hippocampal region. An  
559 autoradiographic study in the mouse. *Exp Neurol Suppl*, Suppl 2:1-70.
- 560 Aronov, D., Nevers, R., and Tank, D.W. (2017). Mapping of a non-spatial dimension by the  
561 hippocampal-entorhinal circuit. *Nature* 543, 719-722.
- 562 Bernier, B.E., Lacagnina, A.F., Ayoub, A., Shue, F., Zemelman, B.V., Krasne, F.B., and Drew,  
563 M.R. (2017). Dentate Gyrus Contributes to Retrieval as well as Encoding: Evidence from  
564 Context Fear Conditioning, Recall, and Extinction. *J Neurosci* 37, 6359-6371.
- 565 Berns, D.S., DeNardo, L.A., Pederick, D.T., and Luo, L. (2018). Teneurin-3 controls topographic  
566 circuit assembly in the hippocampus. *Nature*.
- 567 Buzsaki, G., and Mizuseki, K. (2014). The log-dynamic brain: how skewed distributions affect  
568 network operations. *Nat Rev Neurosci* 15, 264-278.
- 569 Cai, D.J., Aharoni, D., Shuman, T., Shobe, J., Biane, J., Song, W., Wei, B., Veshkini, M., La-Vu,  
570 M., Lou, J., *et al.* (2016). A shared neural ensemble links distinct contextual memories encoded  
571 close in time. *Nature* 534, 115-118.
- 572 Cembrowski, M.S., Bachman, J.L., Wang, L., Sugino, K., Shields, B.C., and Spruston, N.  
573 (2016a). Spatial Gene-Expression Gradients Underlie Prominent Heterogeneity of CA1  
574 Pyramidal Neurons. *Neuron* 89, 351-368.
- 575 Cembrowski, M.S., and Menon, V. (2018). Continuous Variation within Cell Types of the  
576 Nervous System. *Trends Neurosci* 41, 337-348.
- 577 Cembrowski, M.S., Phillips, M.G., DiLisio, S.F., Shields, B.C., Winnubst, J., Chandrashekar, J.,  
578 Bas, E., and Spruston, N. (2018a). Dissociable Structural and Functional Hippocampal Outputs  
579 via Distinct Subiculum Cell Classes. *Cell* 173, 1280-1292 e1218.
- 580 Cembrowski, M.S., and Spruston, N. (2019). Heterogeneity within classical cell types is the rule:  
581 lessons from hippocampal pyramidal neurons. *Nat Rev Neurosci* 20, 193-204.
- 582 Cembrowski, M.S., Wang, L., Lemire, A.L., Copeland, M., DiLisio, S.F., Clements, J., and  
583 Spruston, N. (2018b). The subiculum is a patchwork of discrete subregions. *eLife* 7.
- 584 Cembrowski, M.S., Wang, L., Sugino, K., Shields, B.C., and Spruston, N. (2016b). Hipposeq: a  
585 comprehensive RNA-seq database of gene expression in hippocampal principal neurons. *eLife* 5.
- 586 Chawla, M.K., Guzowski, J.F., Ramirez-Amaya, V., Lipa, P., Hoffman, K.L., Marriott, L.K.,  
587 Worley, P.F., McNaughton, B.L., and Barnes, C.A. (2005). Sparse, environmentally selective  
588 expression of Arc RNA in the upper blade of the rodent fascia dentata by brief spatial  
589 experience. *Hippocampus* 15, 579-586.

- 590 Chawla, M.K., Sutherland, V.L., Olson, K., McNaughton, B.L., and Barnes, C.A. (2018).  
591 Behavior-driven arc expression is reduced in all ventral hippocampal subfields compared to  
592 CA1, CA3, and dentate gyrus in rat dorsal hippocampus. *Hippocampus* 28, 178-185.
- 593 Chen, B.K., Murawski, N.J., Cincotta, C., McKissick, O., Finkelstein, A., Hamidi, A.B.,  
594 Merfeld, E., Doucette, E., Grella, S.L., Shpokayte, M., *et al.* (2019). Artificially Enhancing and  
595 Suppressing Hippocampus-Mediated Memories. *Curr Biol* 29, 1885-1894 e1884.
- 596 Ciocchi, S., Passecker, J., Malagon-Vina, H., Mikus, N., and Klausberger, T. (2015). Selective  
597 information routing by ventral hippocampal CA1 projection neurons. *Science* 348, 560-563.
- 598 Claiborne, B.J., Amaral, D.G., and Cowan, W.M. (1990). Quantitative, three-dimensional  
599 analysis of granule cell dendrites in the rat dentate gyrus. *J Comp Neurol* 302, 206-219.
- 600 Daigle, T.L., Madisen, L., Hage, T.A., Valley, M.T., Knoblich, U., Larsen, R.S., Takeno, M.M.,  
601 Huang, L., Gu, H., Larsen, R., *et al.* (2018). A Suite of Transgenic Driver and Reporter Mouse  
602 Lines with Enhanced Brain-Cell-Type Targeting and Functionality. *Cell* 174, 465-480 e422.
- 603 Denny, C.A., Kheirbek, M.A., Alba, E.L., Tanaka, K.F., Brachman, R.A., Laughman, K.B.,  
604 Tomm, N.K., Turi, G.F., Losonczy, A., and Hen, R. (2014). Hippocampal memory traces are  
605 differentially modulated by experience, time, and adult neurogenesis. *Neuron* 83, 189-201.
- 606 Diamantaki, M., Frey, M., Berens, P., Preston-Ferrer, P., and Burgalossi, A. (2016). Sparse  
607 activity of identified dentate granule cells during spatial exploration. *eLife* 5.
- 608 Gerfen, C.R., Paletzki, R., and Heintz, N. (2013). GENSAT BAC cre-recombinase driver lines to  
609 study the functional organization of cerebral cortical and basal ganglia circuits. *Neuron* 80, 1368-  
610 1383.
- 611 GoodSmith, D., Chen, X., Wang, C., Kim, S.H., Song, H., Burgalossi, A., Christian, K.M., and  
612 Knierim, J.J. (2017). Spatial Representations of Granule Cells and Mossy Cells of the Dentate  
613 Gyrus. *Neuron* 93, 677-690 e675.
- 614 Guenther, C.J., Miyamichi, K., Yang, H.H., Heller, H.C., and Luo, L. (2013). Permanent  
615 genetic access to transiently active neurons via TRAP: targeted recombination in active  
616 populations. *Neuron* 78, 773-784.
- 617 Gupta, A., Elgammal, F.S., Proddatur, A., Shah, S., and Santhakumar, V. (2012). Decrease in  
618 tonic inhibition contributes to increase in dentate semilunar granule cell excitability after brain  
619 injury. *J Neurosci* 32, 2523-2537.
- 620 Guskjolen, A., Kenney, J.W., de la Parra, J., Yeung, B.A., Josselyn, S.A., and Frankland, P.W.  
621 (2018). Recovery of "Lost" Infant Memories in Mice. *Curr Biol* 28, 2283-2290 e2283.
- 622 Habib, N., Li, Y.Q., Heidenreich, M., Swiech, L., Avraham-Davidi, I., Trombetta, J.J., Hession,  
623 C., Zhang, F., and Regev, A. (2016). Div-Seq: Single-nucleus RNA-Seq reveals dynamics of rare  
624 adult newborn neurons. *Science* 353, 925-928.

- 625 Harris, J.A., Hirokawa, K.E., Sorensen, S.A., Gu, H., Mills, M., Ng, L.L., Bohn, P., Mortrud, M.,  
626 Ouellette, B., Kidney, J., *et al.* (2014). Anatomical characterization of Cre driver mice for neural  
627 circuit mapping and manipulation. *Frontiers in neural circuits* 8, 76.
- 628 Hitti, F.L., and Siegelbaum, S.A. (2014). The hippocampal CA2 region is essential for social  
629 memory. *Nature* 508, 88-92.
- 630 Jimenez, J.C., Su, K., Goldberg, A.R., Luna, V.M., Biane, J.S., Ordek, G., Zhou, P., Ong, S.K.,  
631 Wright, M.A., Zweifel, L., *et al.* (2018). Anxiety Cells in a Hippocampal-Hypothalamic Circuit.  
632 *Neuron* 97, 670-683 e676.
- 633 Jung, M.W., and McNaughton, B.L. (1993). Spatial selectivity of unit activity in the  
634 hippocampal granular layer. *Hippocampus* 3, 165-182.
- 635 Kheirbek, M.A., Drew, L.J., Burghardt, N.S., Costantini, D.O., Tannenholz, L., Ahmari, S.E.,  
636 Zeng, H., Fenton, A.A., and Hen, R. (2013). Differential control of learning and anxiety along  
637 the dorsoventral axis of the dentate gyrus. *Neuron* 77, 955-968.
- 638 Kjelstrup, K.G., Tuvnes, F.A., Steffenach, H.A., Murison, R., Moser, E.I., and Moser, M.B.  
639 (2002). Reduced fear expression after lesions of the ventral hippocampus. *Proc Natl Acad Sci U*  
640 *S A* 99, 10825-10830.
- 641 Larimer, P., and Strowbridge, B.W. (2008). Nonrandom local circuits in the dentate gyrus. *J*  
642 *Neurosci* 28, 12212-12223.
- 643 Larimer, P., and Strowbridge, B.W. (2010). Representing information in cell assemblies:  
644 persistent activity mediated by semilunar granule cells. *Nat Neurosci* 13, 213-222.
- 645 Lein, E.S., Hawrylycz, M.J., Ao, N., Ayres, M., Bensinger, A., Bernard, A., Boe, A.F., Boguski,  
646 M.S., Brockway, K.S., Byrnes, E.J., *et al.* (2007). Genome-wide atlas of gene expression in the  
647 adult mouse brain. *Nature* 445, 168-176.
- 648 Liu, X., Ramirez, S., Pang, P.T., Puryear, C.B., Govindarajan, A., Deisseroth, K., and Tonegawa,  
649 S. (2012). Optogenetic stimulation of a hippocampal engram activates fear memory recall.  
650 *Nature* 484, 381-385.
- 651 MacDonald, C.J., Lepage, K.Q., Eden, U.T., and Eichenbaum, H. (2011). Hippocampal "time  
652 cells" bridge the gap in memory for discontinuous events. *Neuron* 71, 737-749.
- 653 Madisen, L., Zwingman, T.A., Sunkin, S.M., Oh, S.W., Zariwala, H.A., Gu, H., Ng, L.L.,  
654 Palmiter, R.D., Hawrylycz, M.J., Jones, A.R., *et al.* (2010). A robust and high-throughput Cre  
655 reporting and characterization system for the whole mouse brain. *Nat Neurosci* 13, 133-140.
- 656 Mizuseki, K., and Buzsaki, G. (2013). Preconfigured, skewed distribution of firing rates in the  
657 hippocampus and entorhinal cortex. *Cell reports* 4, 1010-1021.
- 658 Neunuebel, J.P., and Knierim, J.J. (2012). Spatial firing correlates of physiologically distinct cell  
659 types of the rat dentate gyrus. *J Neurosci* 32, 3848-3858.

- 660 O'Keefe, J., and Nadel, L. (1978). *The hippocampus as a cognitive map* (Oxford: Clarendon  
661 Press; Oxford University Press).
- 662 Okuyama, T., Kitamura, T., Roy, D.S., Itohara, S., and Tonegawa, S. (2016). Ventral CA1  
663 neurons store social memory. *Science* 353, 1536-1541.
- 664 Park, S., Kramer, E.E., Mercaldo, V., Rashid, A.J., Insel, N., Frankland, P.W., and Josselyn, S.A.  
665 (2016). Neuronal Allocation to a Hippocampal Engram. *Neuropsychopharmacology* 41, 2987-  
666 2993.
- 667 Paxinos, G., and Franklin, K.B.J. (2004). *The mouse brain in stereotaxic coordinates*, Compact  
668 2nd edn (Amsterdam ; Boston: Elsevier Academic Press).
- 669 Penke, Z., Chagneau, C., and Laroche, S. (2011). Contribution of *Egr1/zif268* to Activity-  
670 Dependent *Arc/Arg3.1* Transcription in the Dentate Gyrus and Area CA1 of the Hippocampus.  
671 *Frontiers in behavioral neuroscience* 5, 48.
- 672 R Development Core Team (2008). *R: A language and environment for statistical computing*  
673 (Vienna, Austria: R Foundation for Statistical Computing).
- 674 Ramirez, S., Liu, X., Lin, P.A., Suh, J., Pignatelli, M., Redondo, R.L., Ryan, T.J., and Tonegawa,  
675 S. (2013). Creating a false memory in the hippocampus. *Science* 341, 387-391.
- 676 Ramirez-Amaya, V., Vazdarjanova, A., Mikhael, D., Rosi, S., Worley, P.F., and Barnes, C.A.  
677 (2005). Spatial exploration-induced *Arc* mRNA and protein expression: evidence for selective,  
678 network-specific reactivation. *J Neurosci* 25, 1761-1768.
- 679 Ramón y Cajal, S. (1911). *Histologie du système nerveux de l'homme & des vertébrés* (Maloine,  
680 Paris: Oxford University Press).
- 681 Rao-Ruiz, P., Couey, J.J., Marcelo, I.M., Bouwkamp, C.G., Slump, D.E., Matos, M.R., van der  
682 Loo, R.J., Martins, G.J., van den Hout, M., van, I.W.F., *et al.* (2019). Engram-specific  
683 transcriptome profiling of contextual memory consolidation. *Nature communications* 10, 2232.
- 684 Redondo, R.L., Kim, J., Arons, A.L., Ramirez, S., Liu, X., and Tonegawa, S. (2014).  
685 Bidirectional switch of the valence associated with a hippocampal contextual memory engram.  
686 *Nature* 513, 426-430.
- 687 Ryan, T.J., Roy, D.S., Pignatelli, M., Arons, A., and Tonegawa, S. (2015). Memory. Engram  
688 cells retain memory under retrograde amnesia. *Science* 348, 1007-1013.
- 689 Satija, R., Farrell, J.A., Gennert, D., Schier, A.F., and Regev, A. (2015). Spatial reconstruction of  
690 single-cell gene expression data. *Nature biotechnology* 33, 495-502.
- 691 Save, L., Baude, A., and Cossart, R. (2019). Temporal Embryonic Origin Critically Determines  
692 Cellular Physiology in the Dentate Gyrus. *Cereb Cortex* 29, 2639-2652.
- 693 Scharfman, H.E. (2007). *The Dentate Gyrus: A Comprehensive Guide to Structure, Function,*  
694 *and Clinical Implications*, Vol 163 (Amsterdam, The Netherlands: Elsevier).

- 695 Schindelin, J., Arganda-Carreras, I., Frise, E., Kaynig, V., Longair, M., Pietzsch, T., Preibisch,  
696 S., Rueden, C., Saalfeld, S., Schmid, B., *et al.* (2012). Fiji: an open-source platform for  
697 biological-image analysis. *Nat Methods* 9, 676-682.
- 698 Scoville, W.B., and Milner, B. (1957). Loss of recent memory after bilateral hippocampal  
699 lesions. *J Neurol Neurosurg Psychiatry* 20, 11-21.
- 700 Senzai, Y., and Buzsaki, G. (2017). Physiological Properties and Behavioral Correlates of  
701 Hippocampal Granule Cells and Mossy Cells. *Neuron* 93, 691-704 e695.
- 702 Seress, L., and Pokorny, J. (1981). Structure of the granular layer of the rat dentate gyrus. A light  
703 microscopic and Golgi study. *J Anat* 133, 181-195.
- 704 Skaggs, W.E., McNaughton, B.L., Wilson, M.A., and Barnes, C.A. (1996). Theta phase  
705 precession in hippocampal neuronal populations and the compression of temporal sequences.  
706 *Hippocampus* 6, 149-172.
- 707 Soltesz, I., and Losonczy, A. (2018). CA1 pyramidal cell diversity enabling parallel information  
708 processing in the hippocampus. *Nat Neurosci* 21, 484-493.
- 709 Spellman, T., Rigotti, M., Ahmari, S.E., Fusi, S., Gogos, J.A., and Gordon, J.A. (2015).  
710 Hippocampal-prefrontal input supports spatial encoding in working memory. *Nature* 522, 309-  
711 314.
- 712 Taniguchi, H., He, M., Wu, P., Kim, S., Paik, R., Sugino, K., Kvitsiani, D., Fu, Y., Lu, J., Lin,  
713 Y., *et al.* (2011). A resource of Cre driver lines for genetic targeting of GABAergic neurons in  
714 cerebral cortex. *Neuron* 71, 995-1013.
- 715 Tonegawa, S., Pignatelli, M., Roy, D.S., and Ryan, T.J. (2015). Memory engram storage and  
716 retrieval. *Curr Opin Neurobiol* 35, 101-109.
- 717 van Groen, T., Miettinen, P., and Kadish, I. (2003). The entorhinal cortex of the mouse:  
718 organization of the projection to the hippocampal formation. *Hippocampus* 13, 133-149.
- 719 Wang, F., Flanagan, J., Su, N., Wang, L.C., Bui, S., Nielson, A., Wu, X., Vo, H.T., Ma, X.J., and  
720 Luo, Y. (2012). RNAscope: a novel in situ RNA analysis platform for formalin-fixed, paraffin-  
721 embedded tissues. *J Mol Diagn* 14, 22-29.
- 722 Williams, P.A., Larimer, P., Gao, Y., and Strowbridge, B.W. (2007). Semilunar granule cells:  
723 glutamatergic neurons in the rat dentate gyrus with axon collaterals in the inner molecular layer.  
724 *J Neurosci* 27, 13756-13761.
- 725 Wyss, J.M., Swanson, L.W., and Cowan, W.M. (1979). Evidence for an input to the molecular  
726 layer and the stratum granulosum of the dentate gyrus from the supramammillary region of the  
727 hypothalamus. *Anat Embryol (Berl)* 156, 165-176.
- 728 Xu, C., Krabbe, S., Grundemann, J., Botta, P., Fadok, J.P., Osakada, F., Saur, D., Grewe, B.F.,  
729 Schnitzer, M.J., Callaway, E.M., *et al.* (2016). Distinct Hippocampal Pathways Mediate  
730 Dissociable Roles of Context in Memory Retrieval. *Cell* 167, 961-972 e916.

731



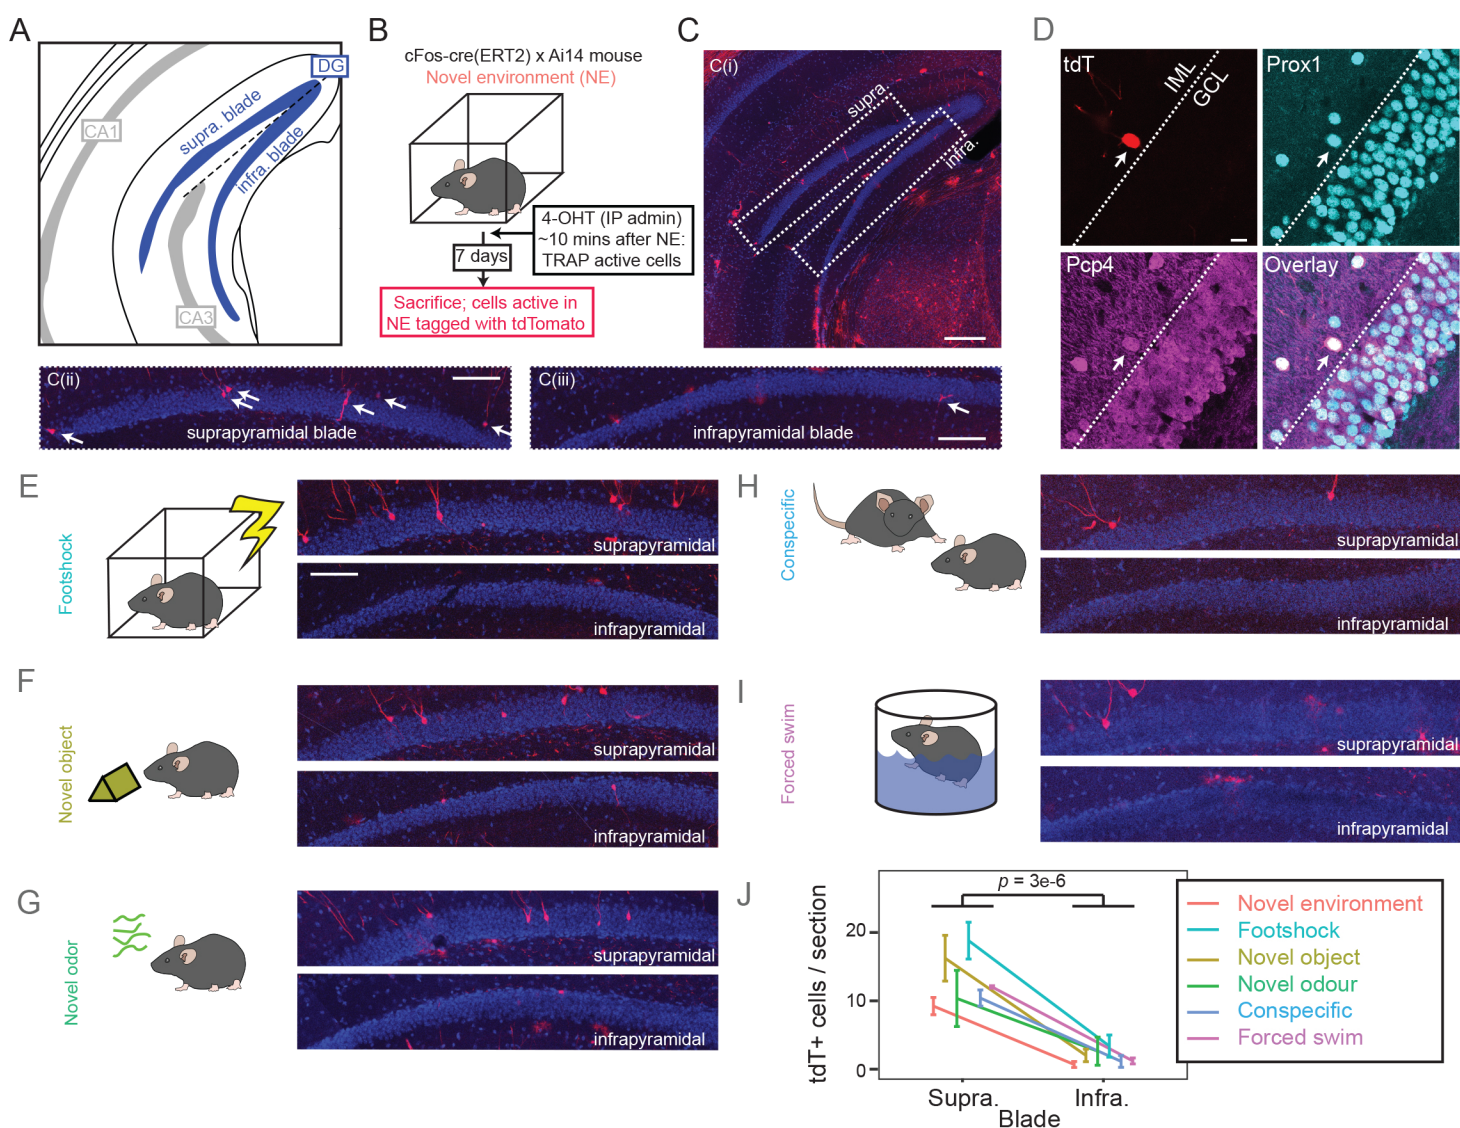

Fig. 1. Granule cells of the suprapyramidal blade of the dentate gyrus are preferentially activated across a range of behavioral paradigms.

A. Atlas illustrating the blades of the DG in a coronal section. Modified from (Paxinos and Franklin, 2004). B. Schematic of tdTomato labeling of cells active during novel environment exploration. C. Optical section of tdTomato labeled cells following NE exploration. C(i) depicts overview, whereas C(ii) and C(iii) depict expansions of the suprapyramidal and infrapyramidal blades, respectively. Arrows denote labeled cell bodies with morphologies consistent with GCs. Scale bars: 200, 100, and 100  $\mu\text{m}$ , respectively. D. Labeled cells were positive the DG GC markers Prox1 and Pcp4, as assayed via immunohistochemistry. Dashed line denotes boundary between inner molecular layer (IML) and granule cell layer (GCL). Scale bar: 5  $\mu\text{m}$ . E-I. As in C(ii,iii), but for a variety of behavioral paradigms. Scale bar: 100  $\mu\text{m}$ . J. Summary of the number of labeled cells, per 100  $\mu\text{m}$ -thick section, for the two blades of the dentate gyrus. Central tendency and error bars denote mean  $\pm$  SEM.

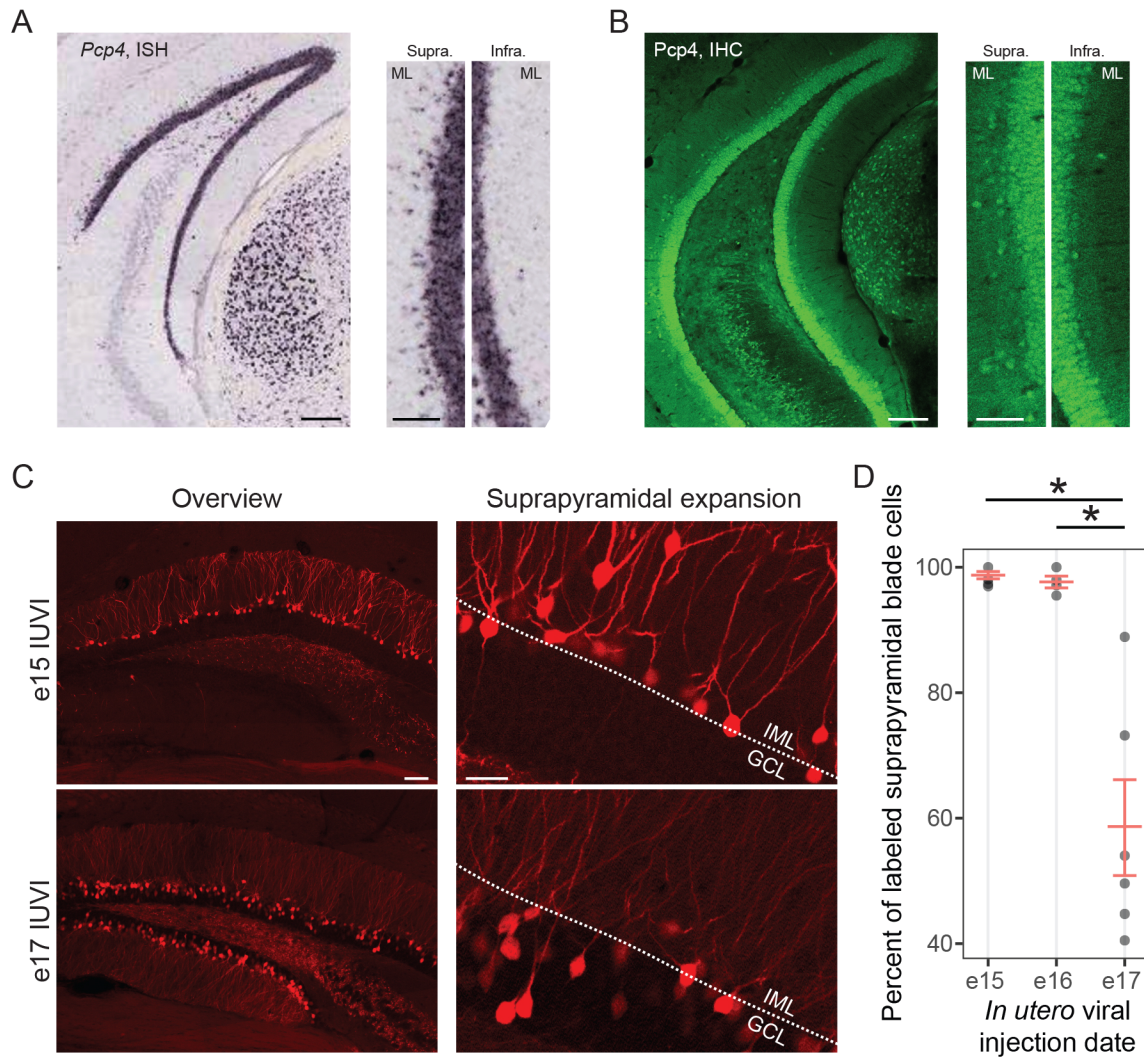

Fig. 2. The blades of the dentate gyrus exhibit mature and birthdate differences.

A. Left: ISH for the DG marker gene *Pcp4*. Scale bar: 200  $\mu$ m. Right: magnification of the suprapyramidal and infrapyramidal blades. Note the suprapyramidal blade is prominently enriched for *Pcp4*-expressing cell bodies displaced into the MLs. Scale bar: 100  $\mu$ m. B. As in (A), but for IHC detection of *Pcp4* protein. C. Top row: Labeled granule cells in mature mice following birthdate labeling of neurons using in utero viral injections (IUVIs) at e15, shown in both overviews (left) and expansions of the suprapyramidal blade (right). Scale bars, left and right: 100  $\mu$ m and 25  $\mu$ m. Bottom row: as in top row, but for in utero viral injections at e17. D. Summary of labeled cells across e15, e16, and e17 injection time points. Individual data points represent results from individual animals, and red points with error bars reflect mean  $\pm$  SEM for each time point.

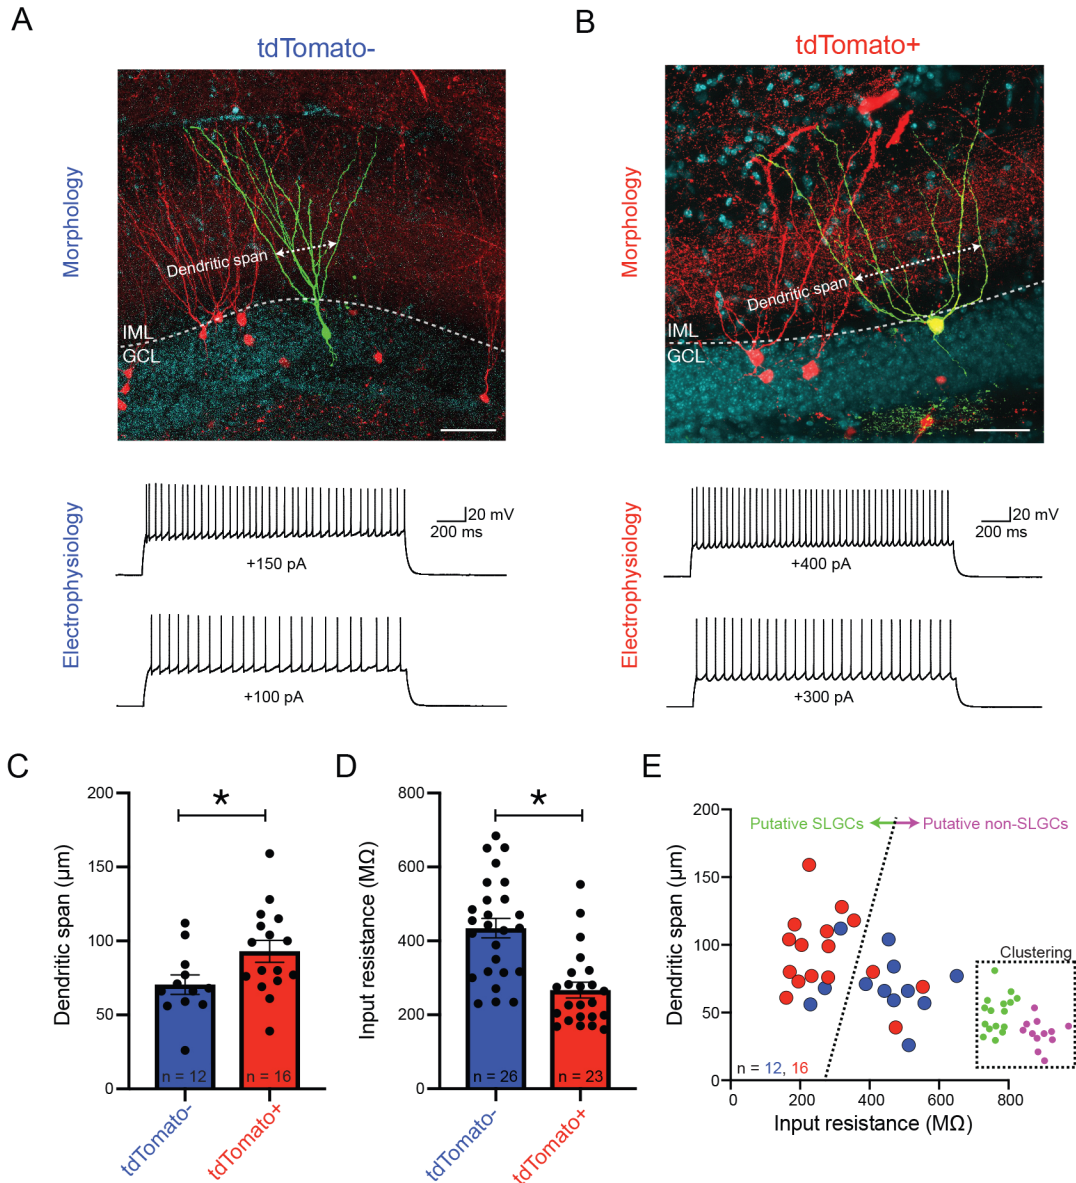

Fig. 3. Activity-labeled neurons are consistent with semilunar granule cells.

A. Top: Example morphology of a tdTomato-negative granule cell, recorded via whole-cell patch clamp *ex vivo*. Dendritic span, defined as the distance between the two outermost dendrites at 50  $\mu\text{m}$  above the initial bifurcation of primary dendrite, is shown. Scale bar: 50  $\mu\text{m}$ . Bottom: Example voltage responses following current step injection for the same cell. B. As in (A), but for a tdTomato-positive granule cell. C, D. Example of morphological (dendritic span, C) and electrophysiological (input resistance, D) properties of tdTomato-negative and tdTomato-positive cells. See Table S1 for full list of measured parameters and statistical tests. E. Two-parameter scatterplot of input resistance and dendritic span, illustrating separation that is recapitulated by k-means clustering (green and magenta points, inset).

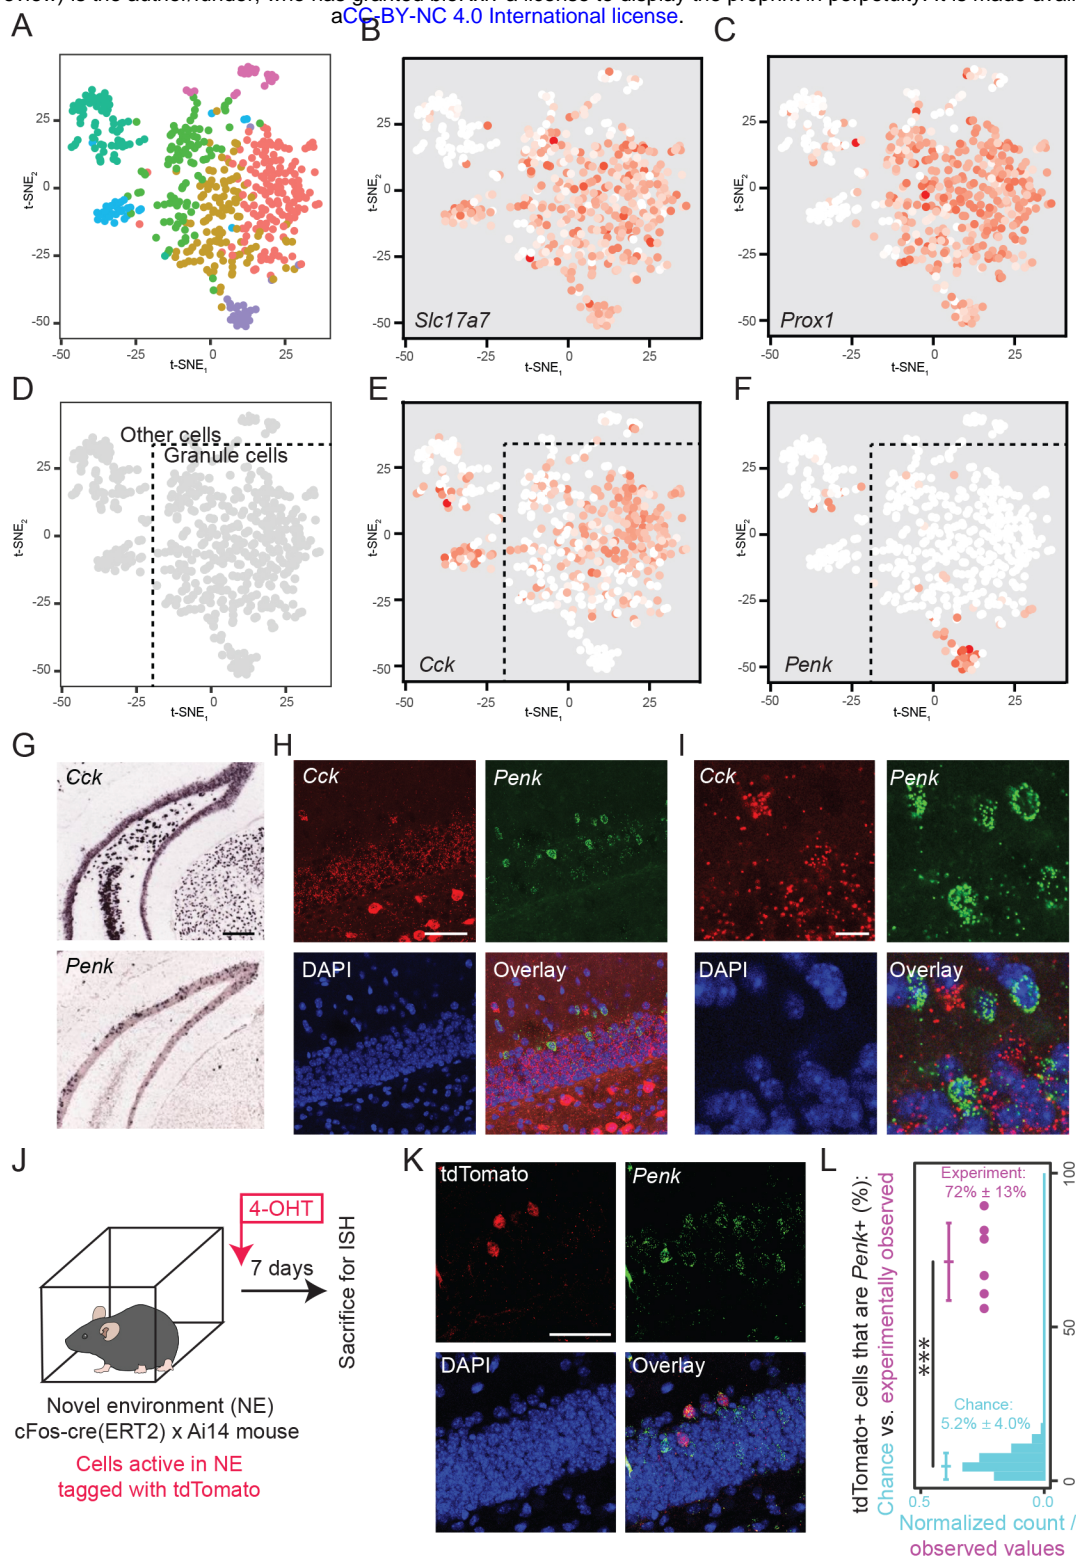

Fig. 4. The DG embeds a sparse, blade-enriched discrete GC subtype that is preferentially recruited during behavior.

**A.** tSNE visualization of scRNA-seq transcriptomes from the dentate gyrus. Colors denote different clusters of cells. **B.** Expression of *Slc17a7*, a marker of excitatory neurons. **C.** Expression of *Prox1*, a marker of GCs. **D.** Deconstruction of the scRNA-seq landscape into GCs and other cell types. **E, F.** Within the GC population, two subtypes of GCs can be identified based upon mutually exclusive expression of *Cck* and *Penk*. **G.** Single-color ISH of *Cck* and *Penk*. Scale bar: 100  $\mu$ m. **H, I.** Overview (**H**) and magnification (**I**) of two-color smFISH of *Cck* and *Penk*. Scale bars: 50  $\mu$ m and 10  $\mu$ m. **J.** Illustration of behavioral paradigm to compare activity-labeled cells with *Penk*-expressing cells. **K.** Representative images of overlap between activity-labeled cells and *Penk*-expressing cells. Scale bar: 50  $\mu$ m. **L.** Quantification of activity-labeled cells that also express *Penk*.
